# Supplementary material
Source: HighWire-hosted journal article supplement (https://qualitysafety.bmj.com/highwire/filestream/161592/field_highwire_adjunct_files/3/bmjqs-2021-014225supp004_data_supplement.pdf)

## Appendix 4: Materials and Methods Timeline

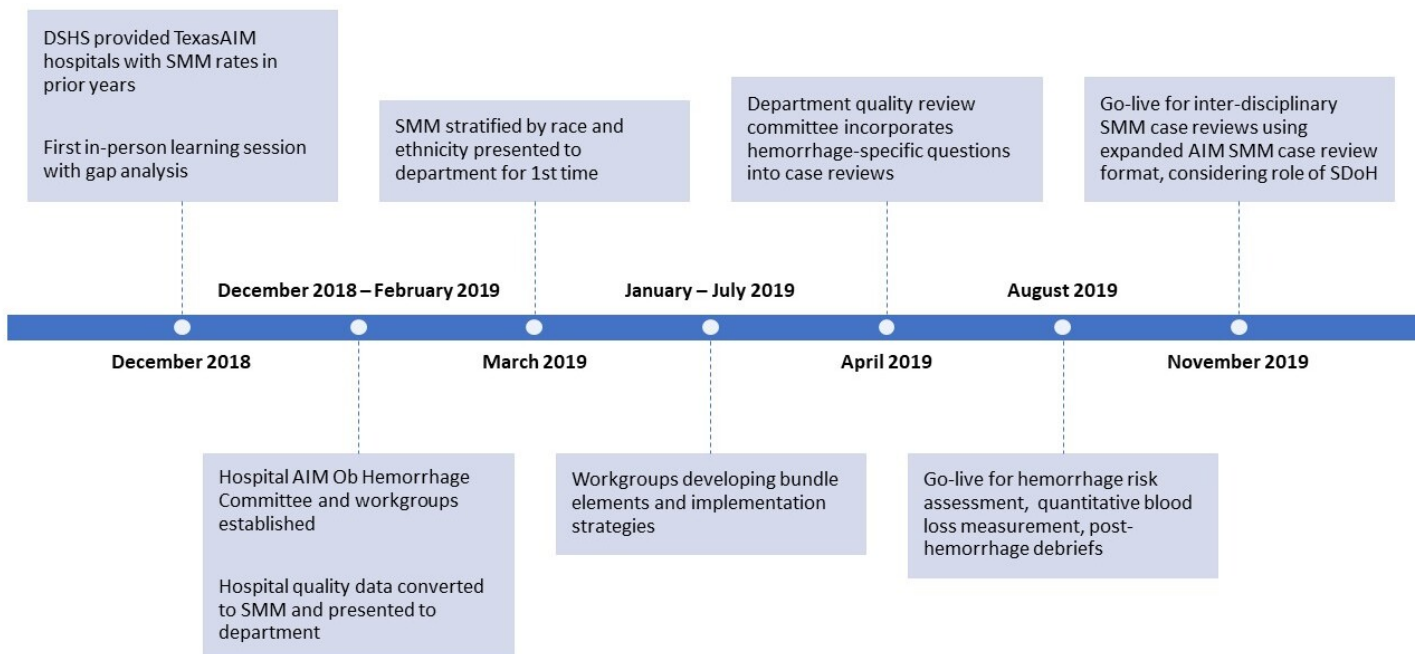

Supplement: bmjqs-2021-014225supp004_data_supplement.pdf [file bmjqs-2021-014225supp004_data_supplement.pdf]
